# Supplementary material
Source: PubMed Central journal article supplement (PMC9989831)
Supplement: mmc1.pdf [file mmc1.pdf]

# THE LANCET

## Healthy Longevity

### Supplementary appendix

This appendix formed part of the original submission and has been peer reviewed. We post it as supplied by the authors.

Supplement to: Leece P, Whelan M, Costa AP, et al. Nursing home crowding and its association with outbreak-associated respiratory infection in Ontario, Canada before the COVID-19 pandemic (2014–19): a retrospective cohort study. *Lancet Healthy Longev* 2023; **4**: e107–14.

**Supplemental Materials For --- Nursing home crowding and its association with outbreak-associated respiratory infection prior to the COVID-19 pandemic (2014–2019) in Ontario, Canada: a cohort study of 588 homes – Table of Contents**

**Page 2 ... Appendix Table 1. Unadjusted and adjusted associations of nursing home characteristics with outbreak-associated respiratory infections, deaths, and outbreak frequency and outbreak size in Ontario, 2014-2019.**

**Page 3 ... Appendix Table 2. Sensitivity analyses of modeling decision impact on the coefficient estimates for crowding in the analysis of the incidence of respiratory infections in nursing homes.**

**Page 3 ... Appendix Figure 1. A comparison of binary, linear, and spline-based modeling of the crowding effect.**

**Page 4 ... Appendix Table 3. Nursing-home crowding index risk ratio for respiratory pathogen-specific outbreak-associated infections and deaths.**

**Appendix Table 1. Unadjusted and adjusted associations of nursing home characteristics with outbreak-associated respiratory infections, deaths, and outbreak frequency and outbreak size in Ontario, 2014-2019.**

| Term                                                              | Infection incidence (RR, 95%CI) |                   | Death incidence (RR, 95%CI) |                   | Outbreak frequency (RR, 95%CI) |                    | Outbreak size (RR, 95%CI) |                   |
|-------------------------------------------------------------------|---------------------------------|-------------------|-----------------------------|-------------------|--------------------------------|--------------------|---------------------------|-------------------|
|                                                                   | Unadjusted                      | Adjusted          | Unadjusted                  | Adjusted          | Unadjusted                     | Adjusted           | Unadjusted                | Adjusted          |
| Crowding index (per 1 resident per room increase)                 | 1.92 (1.74, 2.11)               | 1.89 (1.64, 2.17) | 1.96 (1.68, 2.28)           | 2.34 (1.88, 2.92) | 1.02 (0.92, 1.13)              | 1.42 (1.25, 1.61)  | 1.79 (1.65, 1.94)         | 1.28 (1.19, 1.37) |
| Nursing home size                                                 |                                 |                   |                             |                   |                                |                    |                           |                   |
| Spline basis dimension 1                                          |                                 | 0.72 (0.52, 0.99) |                             | 1.02 (0.62, 1.65) |                                | 3.39 (2.55, 4.51)  |                           | 0.22 (0.19, 0.26) |
| Spline basis dimension 2                                          |                                 | 1.10 (0.57, 2.12) |                             | 0.56 (0.19, 1.65) |                                | 21.0 (11.3, 39.0)  |                           | 0.04 (0.03, 0.06) |
| Spline basis dimension 3                                          |                                 | 0.89 (0.46, 1.73) |                             | 0.78 (0.31, 2.00) |                                | 7.62 (4.43, 13.11) |                           | 0.12 (0.09, 0.16) |
| Sector                                                            |                                 |                   |                             |                   |                                |                    |                           |                   |
| Municipal                                                         |                                 | Reference         |                             | Reference         |                                | Reference          |                           | Reference         |
| For-profit                                                        |                                 | 1.06 (0.90, 1.25) |                             | 1.07 (0.83, 1.37) |                                | 0.94 (0.81, 1.09)  |                           | 1.12 (1.04, 1.21) |
| Non-profit                                                        |                                 | 1.01 (0.84, 1.20) |                             | 1.19 (0.91, 1.56) |                                | 0.95 (0.82, 1.12)  |                           | 1.06 (0.97, 1.15) |
| Region                                                            |                                 |                   |                             |                   |                                |                    |                           |                   |
| Central West                                                      |                                 | Reference         |                             | Reference         |                                | Reference          |                           | Reference         |
| Central East                                                      |                                 | 0.94 (0.80, 1.10) |                             | 1.15 (0.91, 1.46) |                                | 1.06 (0.92, 1.21)  |                           | 0.90 (0.83, 0.96) |
| Eastern                                                           |                                 | 0.89 (0.74, 1.05) |                             | 1.05 (0.81, 1.37) |                                | 0.84 (0.72, 0.98)  |                           | 1.04 (0.95, 1.13) |
| North                                                             |                                 | 0.91 (0.72, 1.15) |                             | 1.05 (0.73, 1.50) |                                | 0.84 (0.68, 1.04)  |                           | 1.08 (0.97, 1.21) |
| South East                                                        |                                 | 0.90 (0.75, 1.07) |                             | 0.97 (0.74, 1.28) |                                | 0.88 (0.75, 1.04)  |                           | 1.02 (0.94, 1.11) |
| Toronto                                                           |                                 | 0.87 (0.71, 1.05) |                             | 0.58 (0.43, 0.78) |                                | 0.83 (0.70, 0.98)  |                           | 1.05 (0.96, 1.15) |
| Nursing home resident demographics                                |                                 |                   |                             |                   |                                |                    |                           |                   |
| Mean age (per 5-y increase)                                       |                                 | 1.08 (0.94, 1.24) |                             | 1.25 (1.01, 1.55) |                                | 1.03 (0.91, 1.17)  |                           | 1.03 (0.96, 1.10) |
| Female (per 5% change)                                            |                                 | 1.01 (0.97, 1.06) |                             | 1.01 (0.95, 1.08) |                                | 1.01 (0.97, 1.05)  |                           | 1.01 (0.99, 1.03) |
| Nursing home resident comorbidities (per 5% change in prevalence) |                                 |                   |                             |                   |                                |                    |                           |                   |
| Dementia                                                          |                                 | 0.99 (0.96, 1.01) |                             | 1.01 (0.97, 1.05) |                                | 1.01 (0.98, 1.03)  |                           | 0.98 (0.97, 1.00) |
| Diabetes                                                          |                                 | 0.99 (0.95, 1.04) |                             | 0.99 (0.93, 1.07) |                                | 1.00 (0.96, 1.04)  |                           | 1.00 (0.98, 1.02) |
| Chronic heart failure                                             |                                 | 0.90 (0.80, 1.02) |                             | 1.03 (0.85, 1.24) |                                | 0.94 (0.84, 1.05)  |                           | 0.98 (0.92, 1.04) |
| Renal failure                                                     |                                 | 0.97 (0.88, 1.08) |                             | 0.99 (0.84, 1.15) |                                | 0.97 (0.88, 1.06)  |                           | 1.00 (0.95, 1.05) |
| Cancer                                                            |                                 | 1.01 (0.90, 1.12) |                             | 1.00 (0.84, 1.19) |                                | 1.01 (0.92, 1.12)  |                           | 0.99 (0.94, 1.05) |
| COPD                                                              |                                 | 1.03 (0.93, 1.15) |                             | 0.91 (0.77, 1.08) |                                | 1.00 (0.91, 1.10)  |                           | 1.03 (0.98, 1.09) |
| Mean resident ADL hierarchy                                       |                                 | 0.97 (0.83, 1.14) |                             | 1.06 (0.83, 1.36) |                                | 0.99 (0.85, 1.14)  |                           | 0.97 (0.90, 1.05) |

**Appendix Table 2. Sensitivity analyses of modeling decision impact on the coefficient estimates for crowding in the analysis of the incidence of respiratory infections in nursing homes.**

| Sensitivity analysis                   | Unadjusted Crowding |         |          |       | Adjusted Crowding |         |          |       |
|----------------------------------------|---------------------|---------|----------|-------|-------------------|---------|----------|-------|
|                                        | Index RR            | 2.5% CL | 97.5% CL | SE    | Index RR          | 2.5% CL | 97.5% CL | SE    |
| Original analysis                      | 1.915               | 1.735   | 2.113    | 0.050 | 1.888             | 1.641   | 2.171    | 0.071 |
| Model fitted using quasipoisson family | 1.782               | 1.628   | 1.951    | 0.046 | 1.721             | 1.505   | 1.969    | 0.068 |
| Negative binomial model fitted in MASS | 1.915               | 1.734   | 2.116    | 0.050 | 1.887             | 1.639   | 2.171    | 0.070 |
| Adjustment of nursing home size        |                     |         |          |       |                   |         |          |       |
| Quintiles                              |                     |         |          |       | 1.859             | 1.613   | 2.142    | 0.072 |
| Linear                                 |                     |         |          |       | 1.879             | 1.643   | 2.149    | 0.068 |

Abbreviations: CL, confidence limit; RR, relative risk; SE, standard error.

**Appendix Figure 1. A comparison of binary, linear, and spline-based modeling of the crowding effect.**

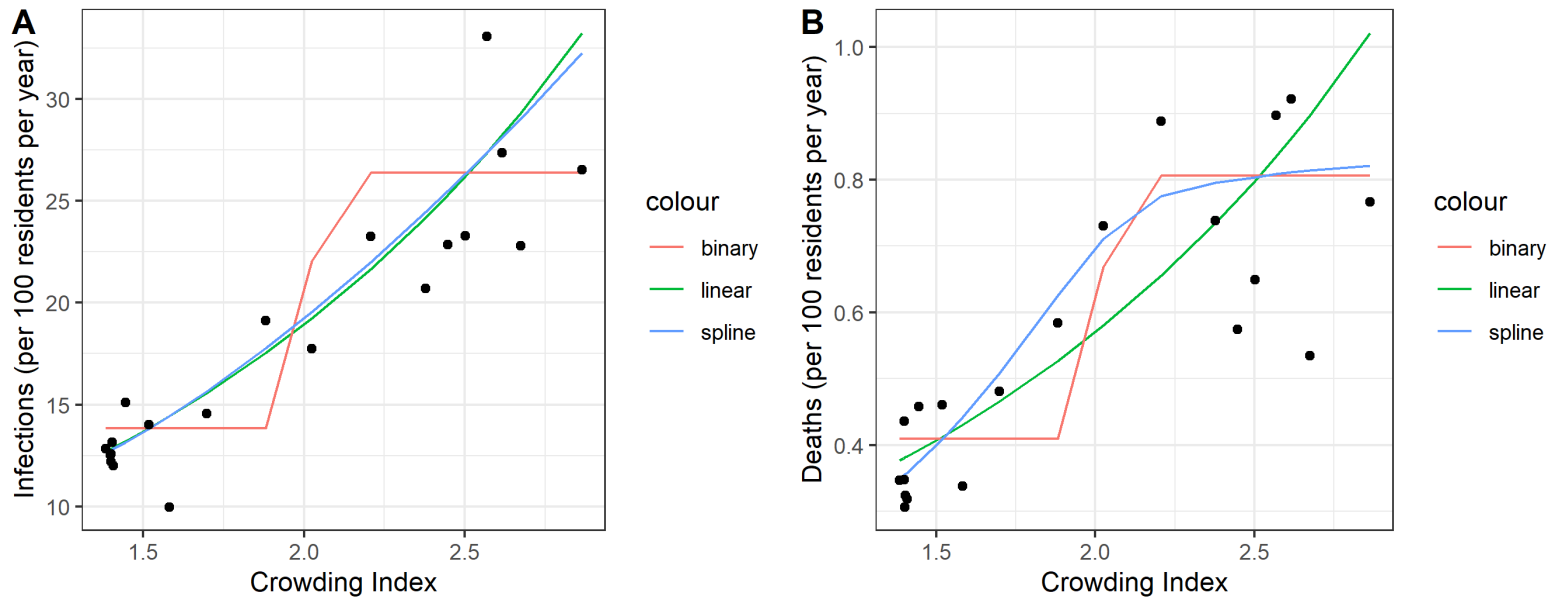

**Appendix Table 3. Nursing-home crowding index risk ratio for respiratory pathogen-specific outbreak-associated infections and deaths.**

| <b>Pathogen Group</b>                     | <b>Adjusted infection incidence (RR, 95%CI)</b> | <b>Adjusted death incidence (RR, 95%CI)</b> |
|-------------------------------------------|-------------------------------------------------|---------------------------------------------|
| Single pathogens                          |                                                 |                                             |
| Coronaviruses                             | 1.42 (0.75, 2.71)                               | 1.80 (0.54, 6.01)                           |
| Human Metapneumovirus                     | 1.96 (0.98, 3.90)                               | 2.24 (0.95, 5.25)                           |
| Human Parainfluenza Virus                 | 1.85 (1.01, 3.39)                               | 1.74 (0.87, 3.48)                           |
| Influenza A                               | 1.59 (1.35, 1.86)                               | 1.67 (1.32, 2.12)                           |
| Influenza B                               | 1.82 (1.24, 2.68)                               | 2.15 (1.32, 3.51)                           |
| Respiratory Syncytial Virus               | 2.00 (1.22, 3.26)                               | 2.31 (1.24, 4.32)                           |
| Rhinovirus/enterovirus                    | 2.84 (1.91, 4.22)                               | 4.09 (2.24, 7.44)                           |
| Other                                     | 1.37 (0.39, 4.80)                               | 2.44 (0.53, 11.2)                           |
| Multiple pathogens                        | 2.52 (1.42, 4.49)                               | 2.55 (1.38, 4.72)                           |
| Unidentified                              | 1.94 (1.51, 2.50)                               | 2.25 (1.41, 3.59)                           |
| Overall estimate (based on meta-analysis) | 1.89 (1.62, 2.20)                               | 2.15 (1.75, 2.65)                           |
